# Supplementary material for: Application of switchable hydrophilicity solvents for recycling multilayer packaging materials
Source: Royal Society of Chemistry journal article supplement (doi:10.1039/c6gc03535c), 2017-01-01
Supplement: c6gc03535c1.pdf [file c6gc03535c1.pdf]

## Application of Switchable Hydrophilicity Solvents to the recycling of multilayer packaging materials

Chiara Samorì, Daniele Cespi, Paola Blair, Paola Galletti, Danilo Malferrari, Fabrizio Passarini, Ivano Vassura, Emilio Tagliavini

**Table S1.** Cradle-to-gate inventory for the disposal of 1 ton of composite packaging into landfill.

| <i>Landfill scenario</i>                            | <i>Amount</i> | <i>Unit</i> |
|-----------------------------------------------------|---------------|-------------|
| <i>Input process</i>                                |               |             |
| Coal, hard, 30.7 MJ/kg                              | 301.0         | kg          |
| Electricity, medium voltage, at grid (China)        | 0.4           | MWh         |
| <i>Avoided process</i>                              |               |             |
| Kraft paper, unbleached, at plant                   | 660.0         | kg          |
| <i>Output process</i>                               |               |             |
| Disposal, PE, 0.4% water, to sanitary landfill      | 200.0         | kg          |
| Disposal, aluminium, 0% water, to sanitary landfill | 50.0          | kg          |
| Disposal, paper, 11.2% water, to sanitary landfill  | 90.0          | kg          |

**Table S2.** Cradle-to-gate inventory for the recovery of 1 ton of composite packaging with formic acid treatment.

| <i>Formic acid scenario</i>                         | <i>Amount</i> | <i>Unit</i> |
|-----------------------------------------------------|---------------|-------------|
| <i>Input process</i>                                |               |             |
| Coal, hard, 30.7 MJ/kg                              | 301.0         | kg          |
| Diesel, at refinery                                 | 3.4           | kg          |
| Electricity, medium voltage, at grid (China)        | 0.6           | MWh         |
| Formic acid, at plant                               | 39.3          | kg          |
| <i>Avoided process</i>                              |               |             |
| Alluminium, primary, at plant                       | 36.0          | kg          |
| Polyethylene, LDPE, granulate, at plant             | 196.0         | kg          |
| Kraft paper, unbleached, at plant                   | 660.0         | kg          |
| <i>Output process</i>                               |               |             |
| Disposal, PE, 0.4% water, to sanitary landfill      | 4.0           | kg          |
| Disposal, aluminium, 0% water, to sanitary landfill | 14.0          | kg          |
| Disposal, paper, 11.2% water, to sanitary landfill  | 90.0          | kg          |

**Table S3.** Cradle-to-gate inventory for the recovery of 1 ton of composite packaging through pyrolysis.

| <i>Pyrolysis scenario*</i>                                                   | <i>Amount</i> | <i>Unit</i> |
|------------------------------------------------------------------------------|---------------|-------------|
| <u>Input process</u>                                                         |               |             |
| Electricity, medium voltage, at grid (China)                                 | 1.6           | MWh         |
| <u>Output process**</u>                                                      |               |             |
| Heat, waste                                                                  | 9.5E-01       | MWh         |
| Acetaldehyde                                                                 | 3.1E-06       | kg          |
| Benzo(a)pyrene                                                               | 3.1E-08       | kg          |
| Benzene                                                                      | 1.2E-03       | kg          |
| Butane                                                                       | 2.2E-03       | kg          |
| Methane, fossil                                                              | 6.2E-03       | kg          |
| Carbon monoxide, fossil                                                      | 6.5E-03       | kg          |
| Carbon dioxide, fossil                                                       | 1.7E+02       | kg          |
| Acetic acid                                                                  | 4.7E-04       | kg          |
| Formaldehyde                                                                 | 3.1E-04       | kg          |
| Mercury                                                                      | 9.3E-08       | kg          |
| Dinitrogen monoxide                                                          | 3.1E-04       | kg          |
| Nitrogen oxides                                                              | 5.6E-02       | kg          |
| PAH, polycyclic aromatic hydrocarbons                                        | 3.1E-05       | kg          |
| Particulates, < 2.5 um                                                       | 6.2E-04       | kg          |
| Pentane                                                                      | 3.7E-03       | kg          |
| Propane                                                                      | 6.2E-04       | kg          |
| Propionic acid                                                               | 6.2E-05       | kg          |
| Sulfur dioxide                                                               | 1.7E-03       | kg          |
| Dioxin, 2,3,7,8 Tetrachlorodibenzo-p-                                        | 9.3E-14       | kg          |
| Toluene                                                                      | 6.2E-04       | kg          |
| Waste water - untreated, slightly organic and anorganic contaminated EU-27 S | 328.0         | kg          |
| Bitumen to HA chemical landfill                                              | 11.0          | kg          |
| Disposal, PE, 0.4% water, to sanitary landfill                               | 113.0         | kg          |
| Disposal, aluminium, 0% water, to sanitary landfill                          | 2.0           | kg          |
| <u>Avoided process</u>                                                       |               |             |
| Alluminium, primary, at plant                                                | 68.0          | kg          |
| Polyethylene, LDPE, granulate, at plant                                      | 187.0         | kg          |
| Hard coal briquettes, at plant                                               | 1.3           | MWh         |
| Electricity, medium voltage, at grid (China)                                 | 0.9           | MWh         |

\* all the input and output were evaluated using the following packaging composition: 63% paper, 30% LDPE and 7% Al. According with average composition the amount of recovered Al and LDPE are estimated around 49 and 125 kg per t treated. On the other hand, the quantity dumped is 3 and 75 kg respectively.

\*\*emissions derived from the combustion of the CO/H<sub>2</sub> fraction and assumed to be equal to the emission of methane burned in furnace.

**Table S4.** Cradle-to-gate inventory for the recovery of 1 ton of composite packaging through switchable solvent.

| <i>SHS scenario</i>                                                          | <i>Amount</i> | <i>Unit</i> |
|------------------------------------------------------------------------------|---------------|-------------|
| <u>Input process</u>                                                         |               |             |
| Electricity, medium voltage, at grid (China)                                 | 0.2           | MWh         |
| Heat, unspecific, in chemical plant                                          | 0.1           | MWh         |
| Water, groundwater consumption                                               | 50            | kg          |
| Coal, hard, 30.7 MJ/kg                                                       | 301.0         | kg          |
| CO <sub>2</sub> *                                                            | 0.6           | kg          |
| DMCHA**                                                                      | 1.0           | kg          |
| <u>Output process</u>                                                        |               |             |
| Waste water - untreated, slightly organic and anorganic contaminated EU-27 S | 2.6E-02       | kg          |
| Disposal, PE, 0.4% water, to sanitary landfill                               | 30.0          | kg          |
| Disposal, aluminium, 0% water, to sanitary landfill                          | 0.5           | kg          |
| Disposal, paper, 11.2% water, to sanitary landfill                           | 90.0          | kg          |
| <u>Avoided process</u>                                                       |               |             |
| Alluminium, primary, at plant                                                | 42.6          | kg          |
| Alluminium oxide, at plant                                                   | 6.9           | kg          |
| Polyethylene, LDPE, granulate, at plant                                      | 170.0         | kg          |
| Kraft paper, unbleached, at plant                                            | 660.0         | kg          |

\* obtained from air using GWP value reported in the literature.<sup>1</sup>

\*\* DMCHA is not reported in software libraries; Finechem tool <sup>2,3</sup> was used to evaluate the carbon footprint due to its synthesis.

**Figure S1.** Contribution of each category to the cumulative score for the recovery treatments only (landfill not included).

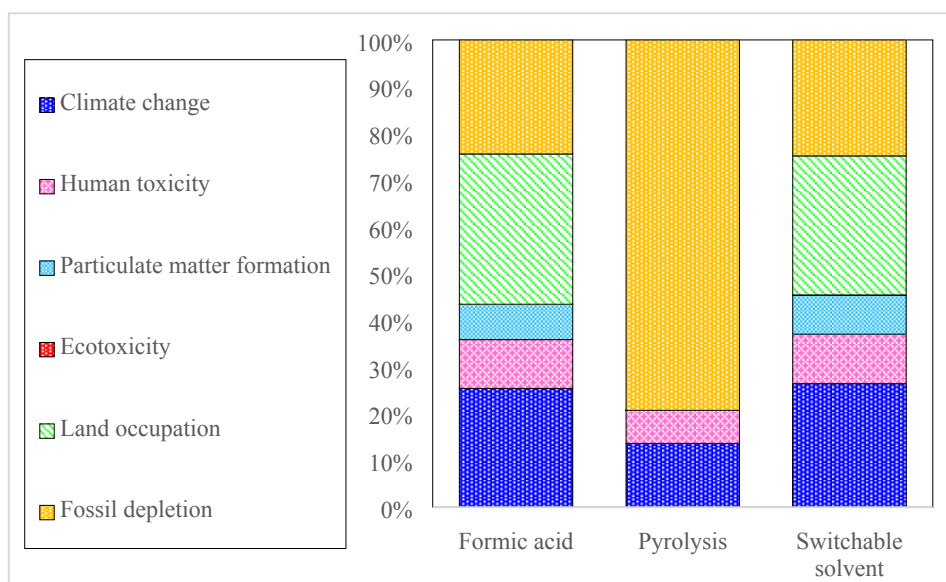

**Figure S2.** Network tool for *a)* the FD and *b)* CC route.

categories, SHS-

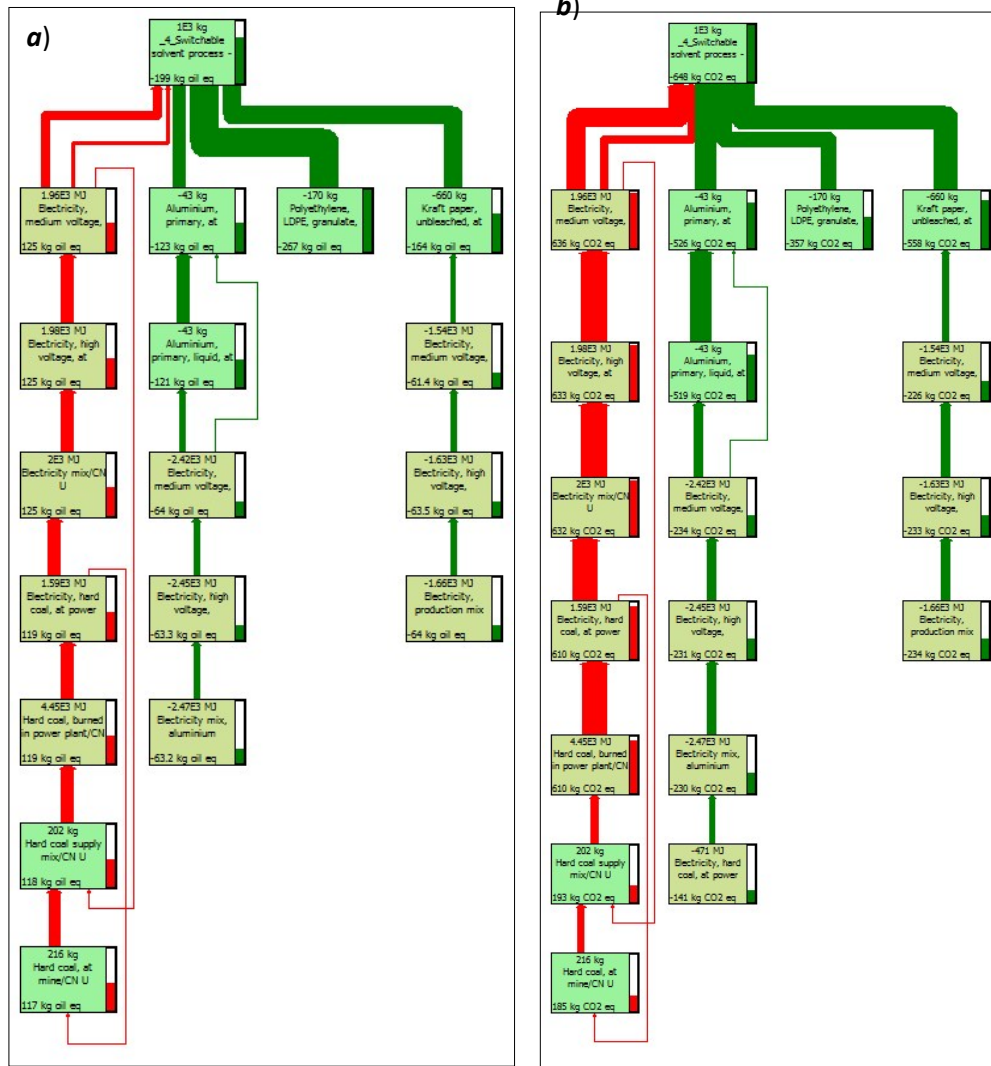

**Table S5.** Inventory of the avoided substances released per PMF and HT categories.

|                                  | <b>Contribution</b> |
|----------------------------------|---------------------|
| <b><u>PMF</u></b>                |                     |
| NOx                              | -37%                |
| PM2.5-10µm                       | -34%                |
| PM<2.5µm                         | -26%                |
| SO <sub>2</sub> &NH <sub>3</sub> | -3%                 |
| <b><u>HT</u></b>                 |                     |
| Pb                               | -21%                |
| V                                | -18%                |
| As                               | -17%                |
| Mn                               | -13%                |

- 1 N. von der Assen, P. Voll, M. Peters and A. Bardow, *Chem. Soc. Rev.*, 2014, **43**, 7982.
- 2 G. Wernet, S. Hellweg, U. Fischer, S. Papadokostantakis and K. Hungerbühler, *Environ. Sci. Technol.*, 2008, **42**, 6717.
- 3 G. Wernet, S. Papadokostadakis, S. Hellweg and K. Hungerbühler, *Green Chem.*, 2009, **11**, 1826.
