# Supplementary figures and images for: Application of switchable hydrophilicity solvents for recycling multilayer packaging materials
Source: Royal Society of Chemistry journal article supplement (doi:10.1039/c6gc03535c), 2017-01-01

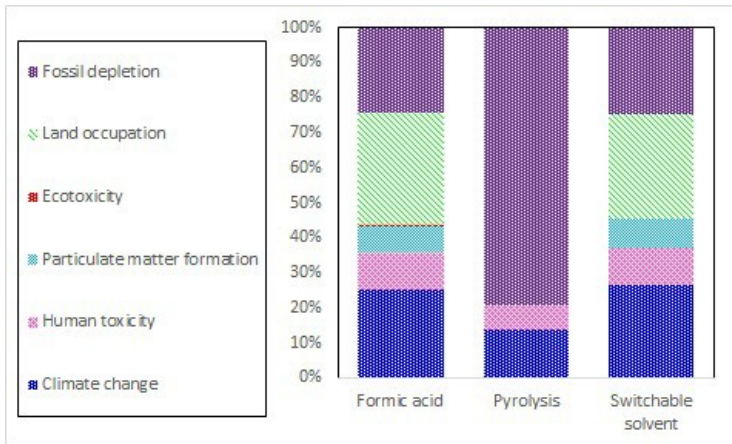

Supplement: c6gc03535c3.pdf [file c6gc03535c3.pdf]

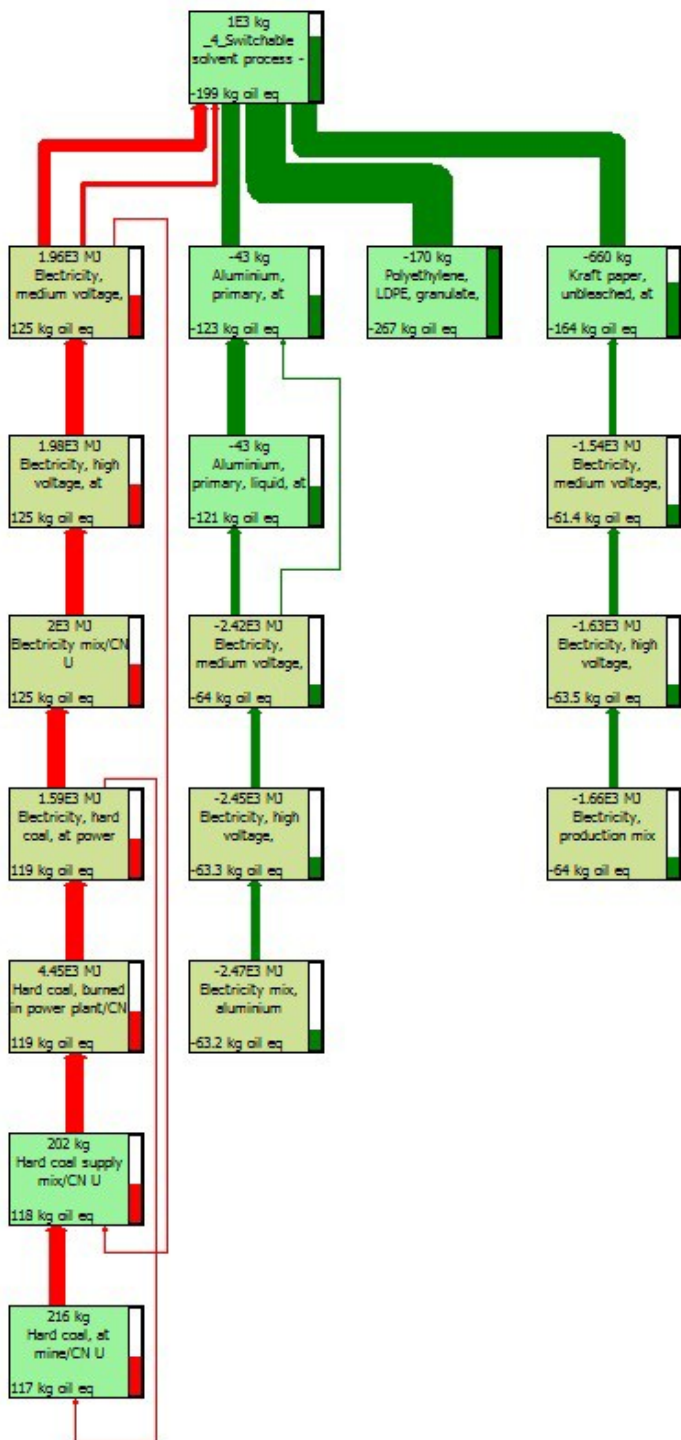

Supplement: c6gc03535c4.pdf [file c6gc03535c4.pdf]

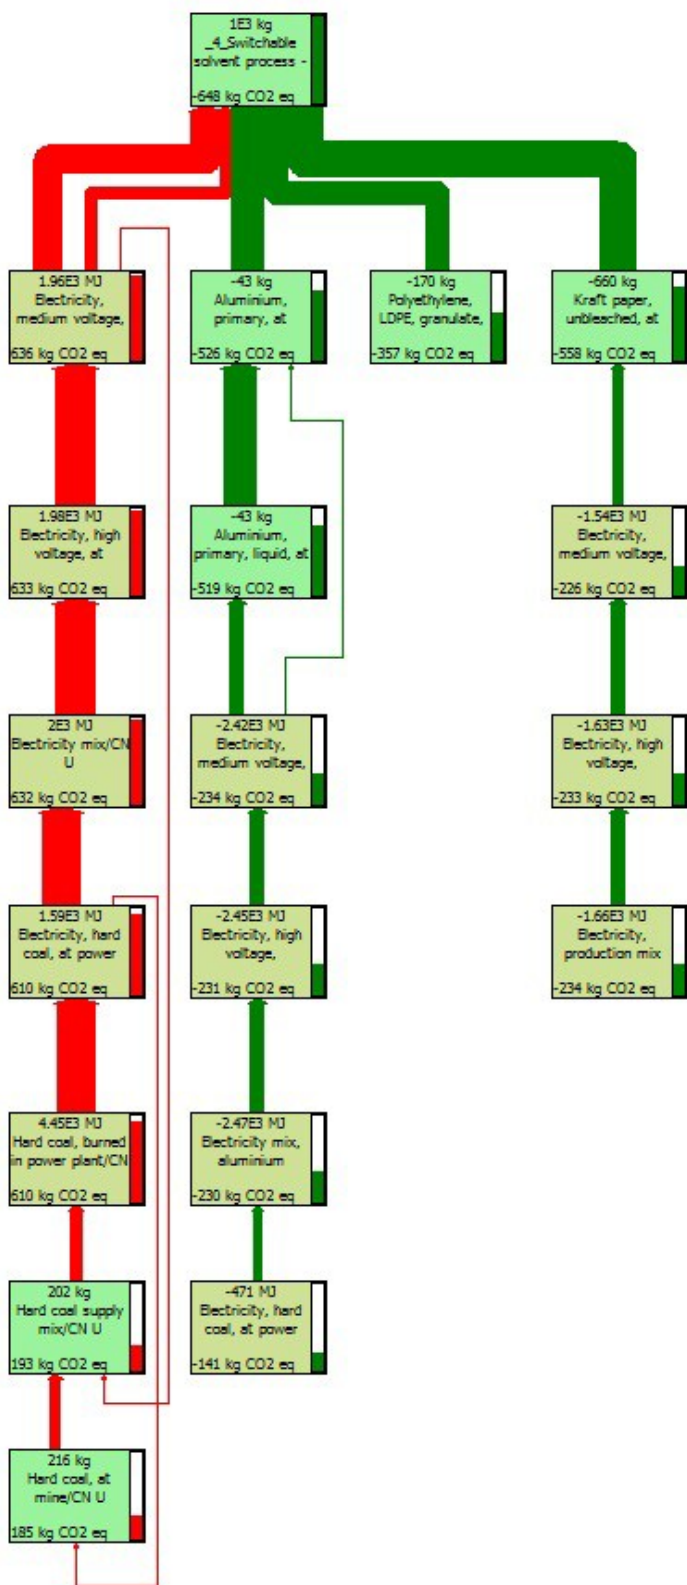

Supplement: c6gc03535c5.pdf [file c6gc03535c5.pdf]
